# Supplementary material for: New tetralactam hosts for squaraine dyes
Source: Royal Society of Chemistry journal article supplement (doi:10.1039/c8ob02596g), 2018-01-01
Supplement: c8ob02596g1.pdf [file c8ob02596g1.pdf]

*Electronic Supporting Information for:*  
**New Tetralactam Hosts for Squaraine Dyes**

Janel M. Dempsey,<sup>§</sup> Qi-Wei Zhang,<sup>§</sup> Allen G. Oliver, Bradley D. Smith\*

Department of Chemistry and Biochemistry, 236 Nieuwland Science Hall,  
University of Notre Dame, Notre Dame, IN 46556, USA

<sup>§</sup>These authors contributed equally to this work.

\*email: smith.115@nd.edu

**Contents**

|                                                             |            |
|-------------------------------------------------------------|------------|
| <b>A. <sup>1</sup>H and <sup>13</sup>C NMR Spectra.....</b> | <b>S2</b>  |
| <b>B. Threading of M3.....</b>                              | <b>S9</b>  |
| <b>C. Evidence Showing No Threading of M4a.....</b>         | <b>S11</b> |
| <b>D. Threading of M5.....</b>                              | <b>S13</b> |
| <b>E. References.....</b>                                   | <b>S14</b> |

## A. $^1\text{H}$ and $^{13}\text{C}$ NMR Spectra

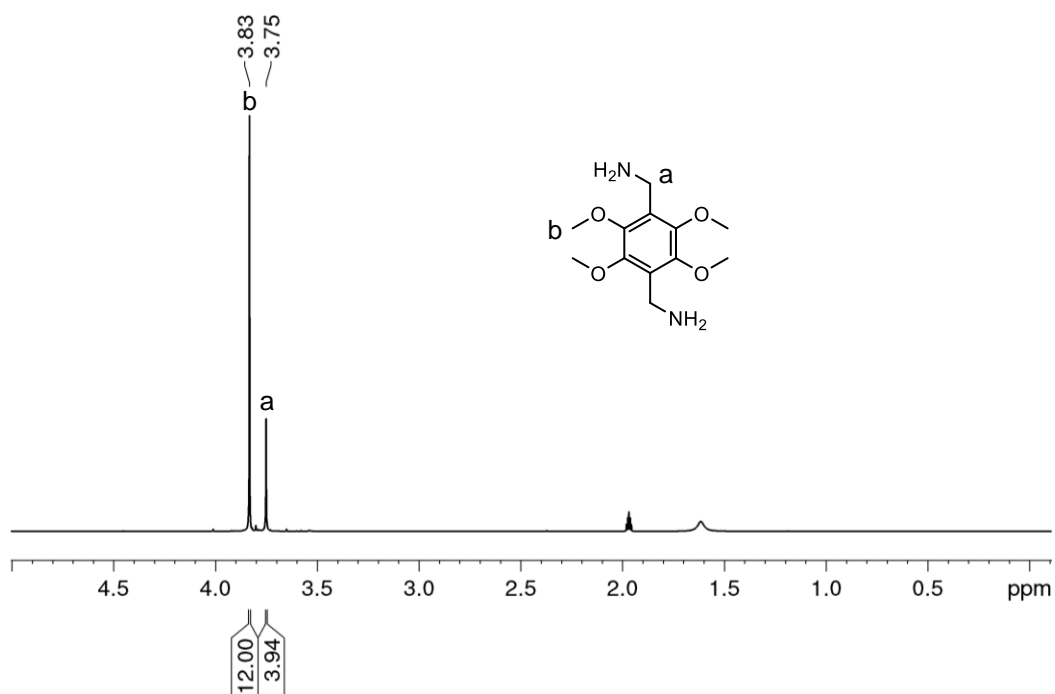

**Figure S1:**  $^1\text{H}$  NMR (400 MHz,  $\text{CD}_3\text{CN}$ , 25 °C) of **4**.

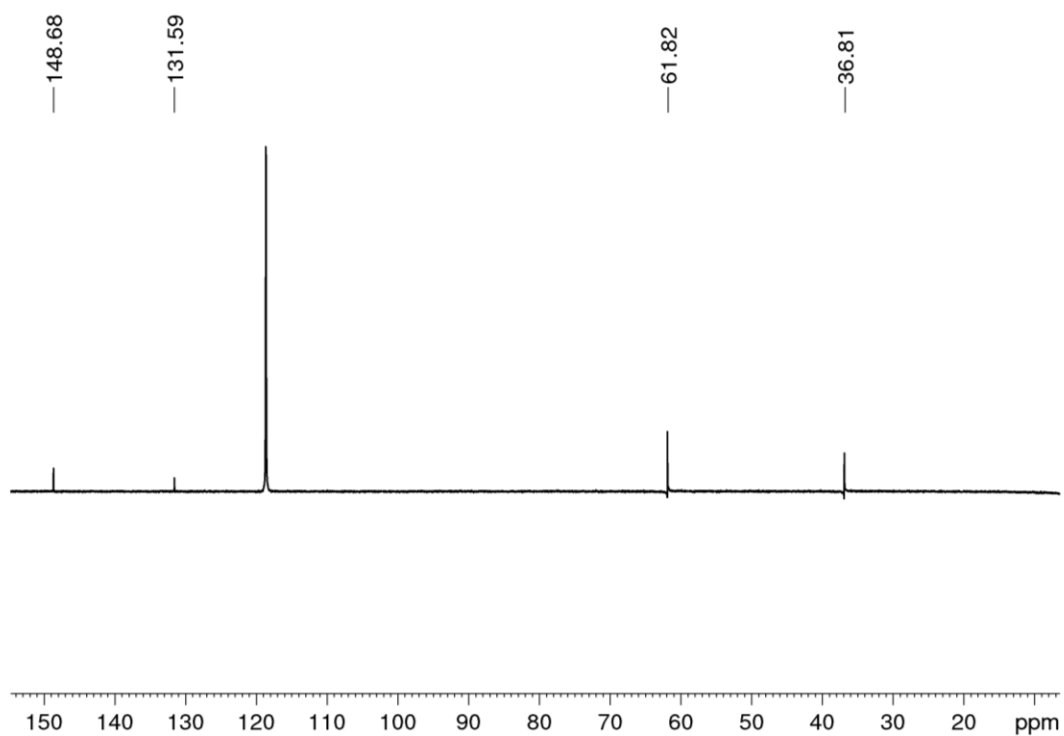

**Figure S2:**  $^{13}\text{C}$  NMR (100 MHz,  $\text{CD}_3\text{CN}$ , 25 °C) of **4**.

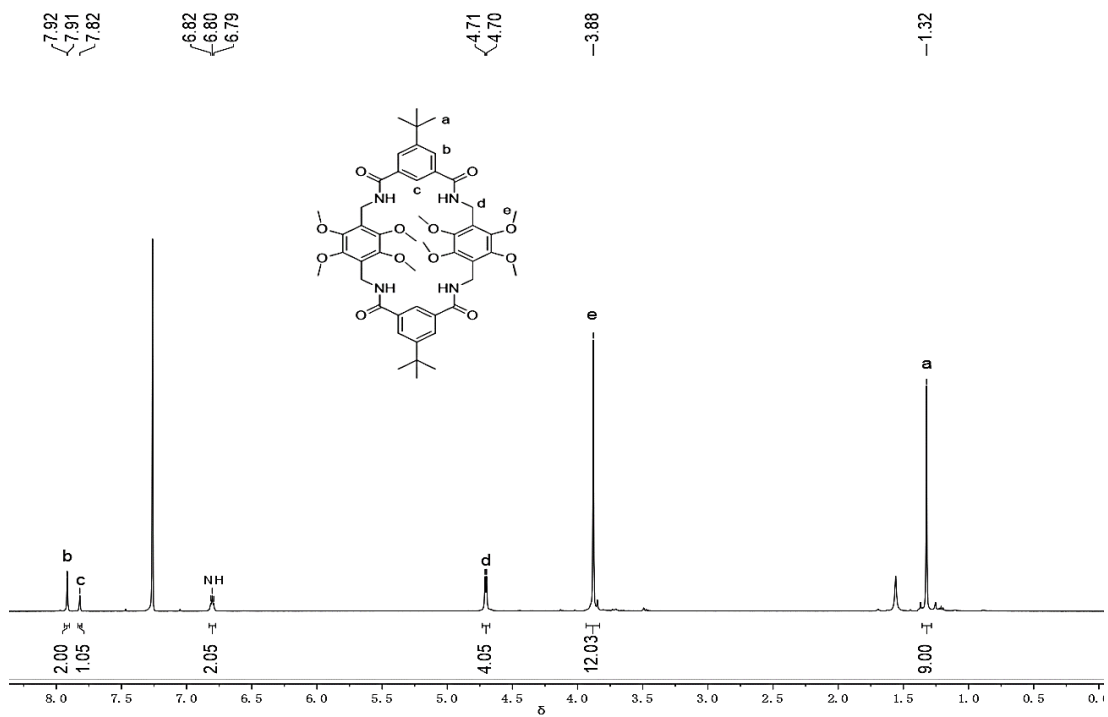

**Figure S3:**  $^1\text{H}$  NMR (500 MHz,  $\text{CDCl}_3$ , 25  $^\circ\text{C}$ ) of **M4a**.

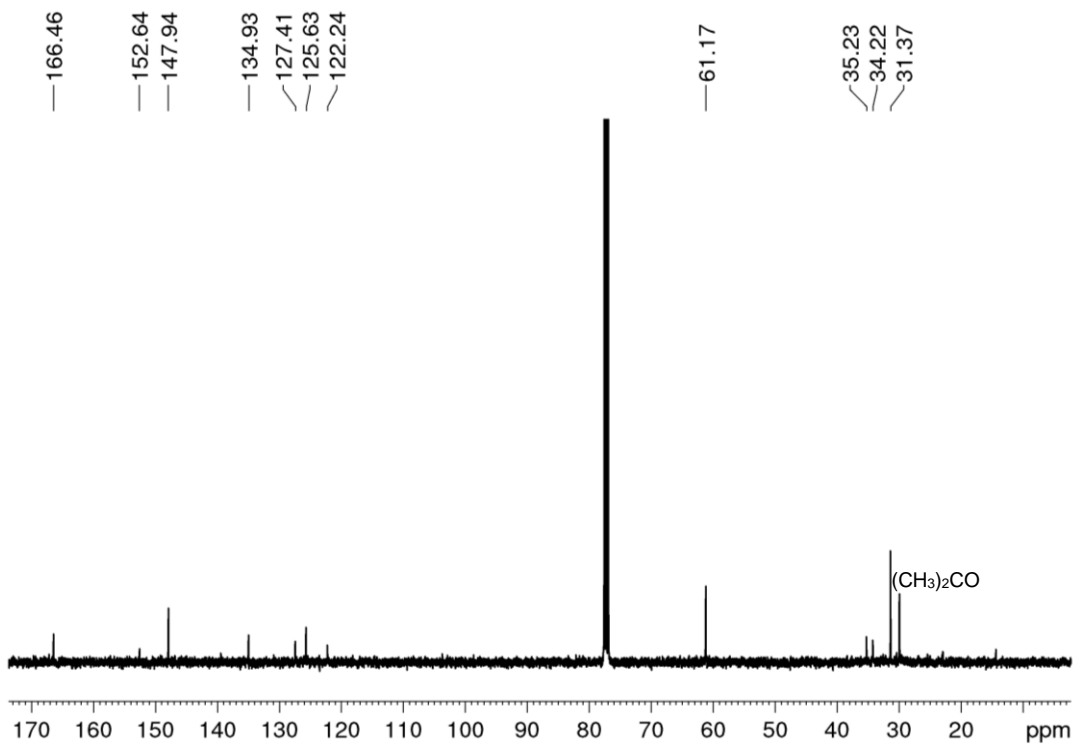

**Figure S4:**  $^{13}\text{C}$  NMR (100 MHz,  $\text{CDCl}_3$ , 25  $^\circ\text{C}$ ) of **M4a**.

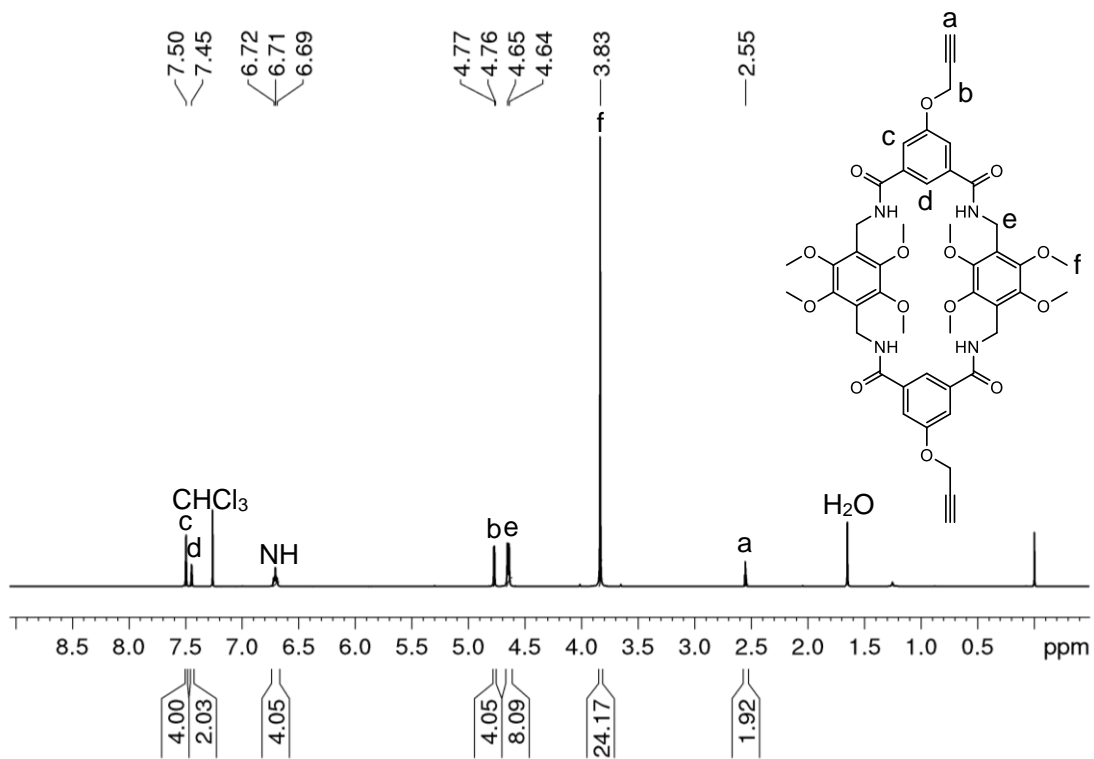

**Figure S5:**  $^1\text{H}$  NMR (400 MHz,  $\text{CDCl}_3$ , 25 °C) of **M4b**.

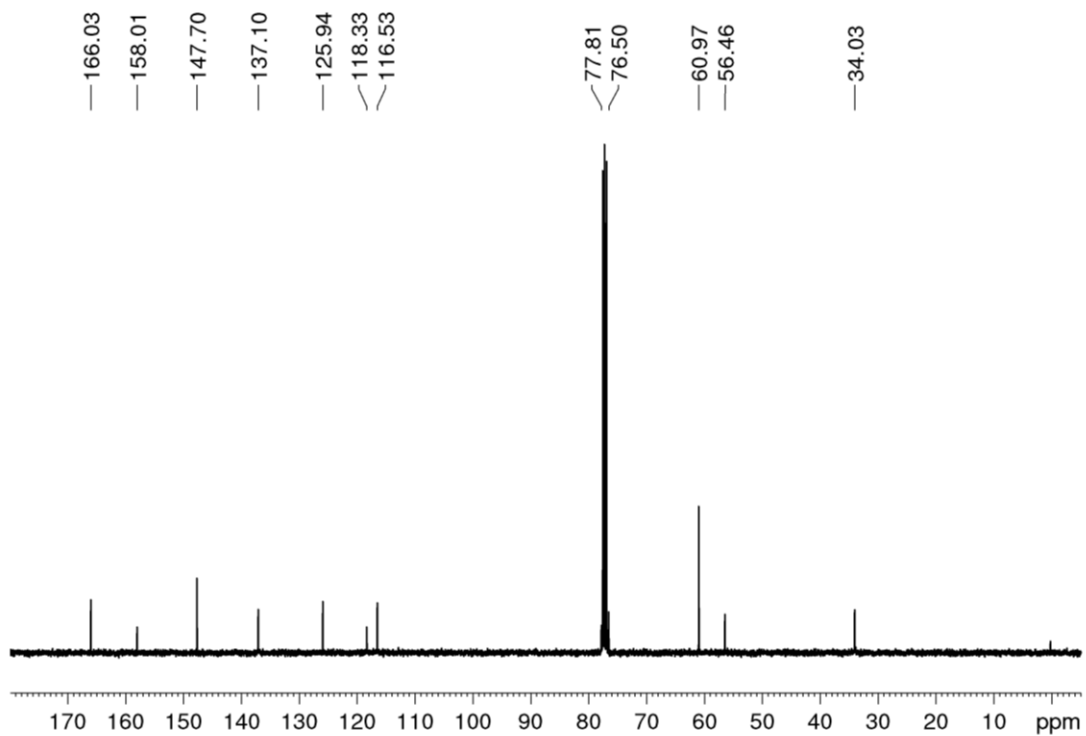

**Figure S6:**  $^{13}\text{C}$  NMR (100 MHz,  $\text{CDCl}_3$ , 25 °C) of **M4b**.

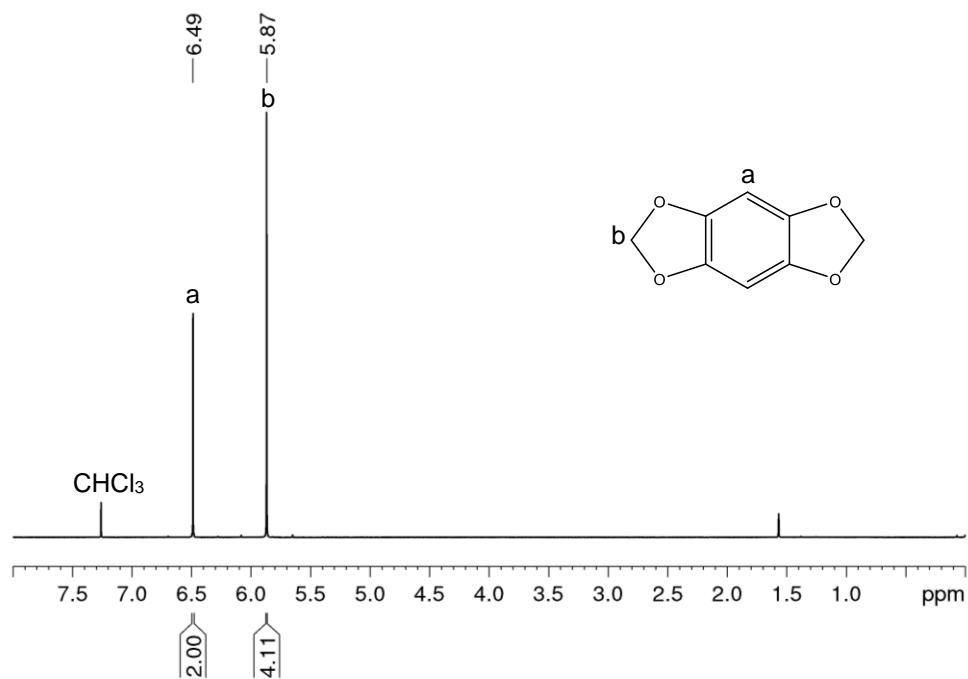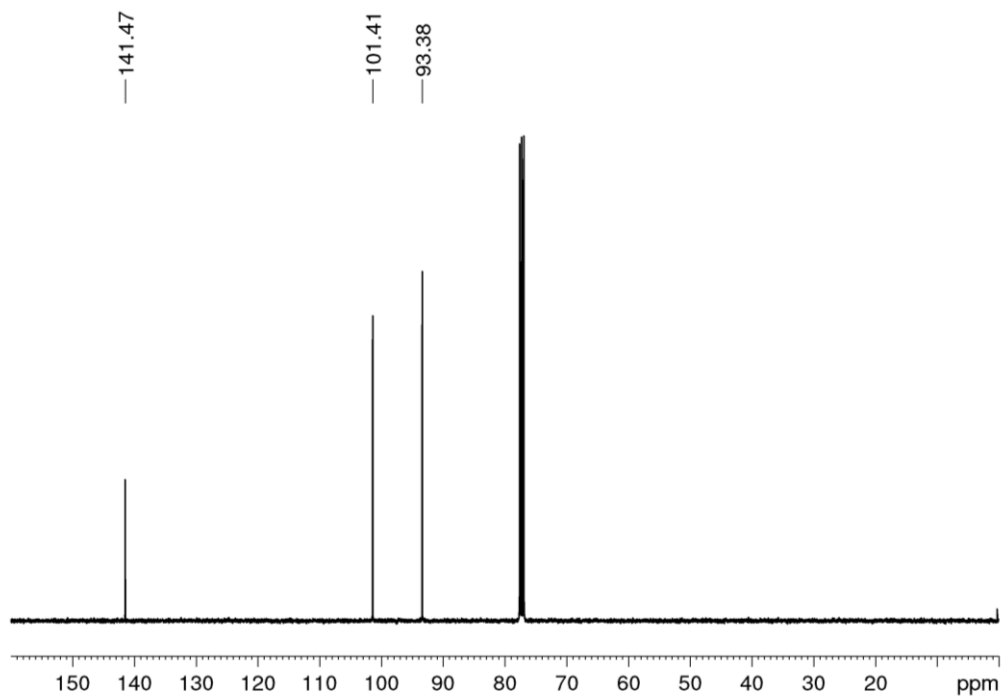

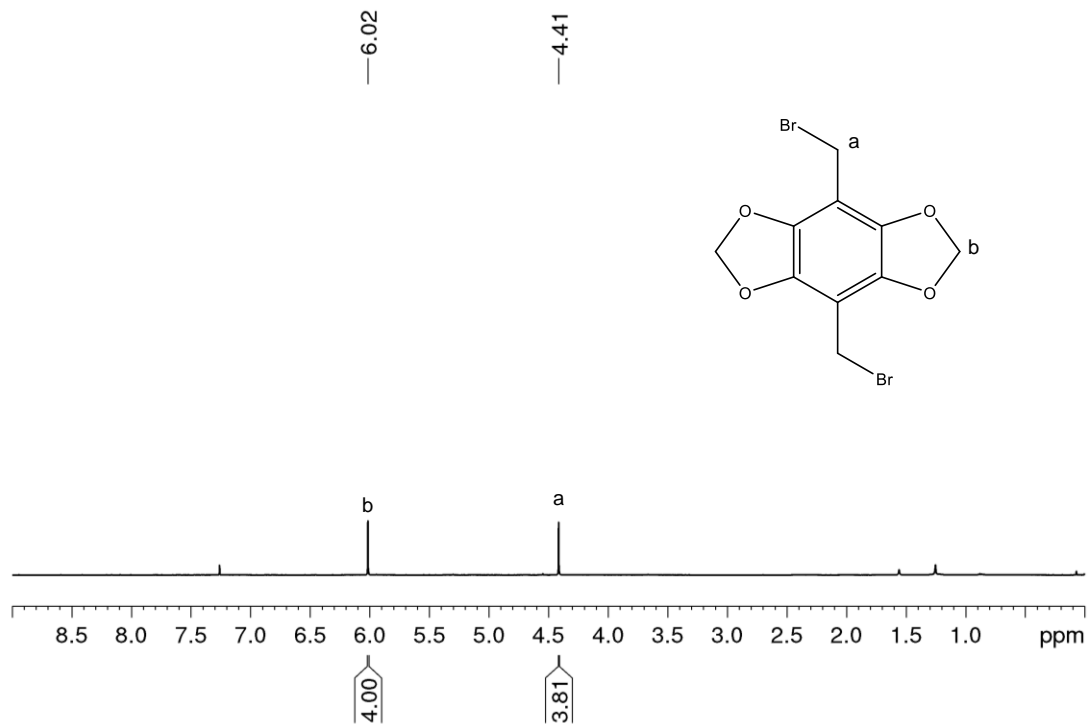

**Figure S9:**  $^1\text{H}$  NMR (500 MHz,  $\text{CDCl}_3$ , 25  $^\circ\text{C}$ ) of **8**.

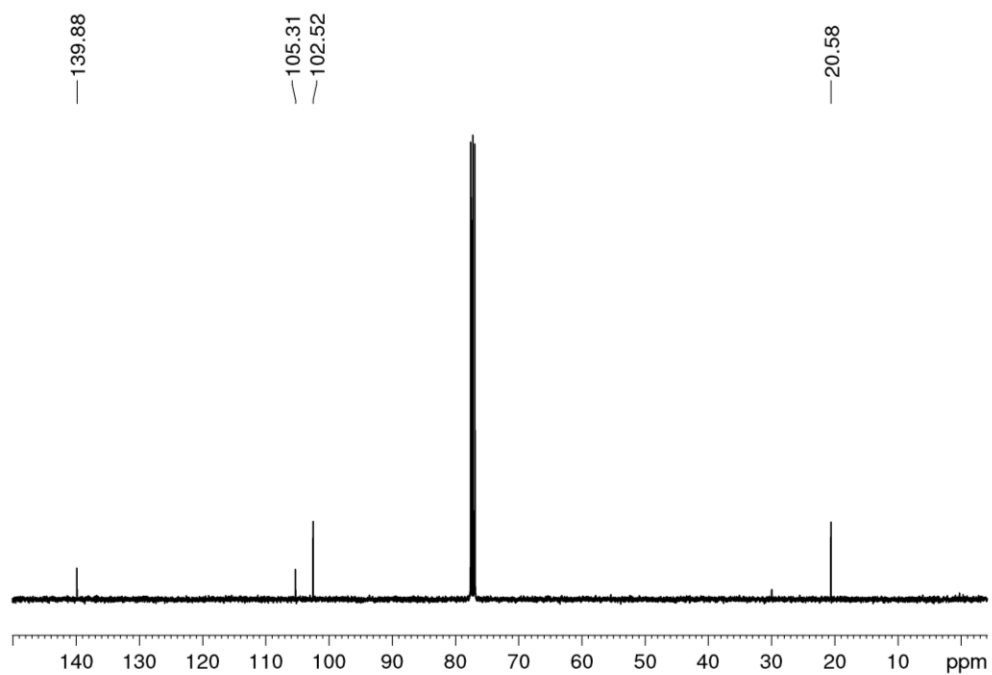

**Figure S10:**  $^{13}\text{C}$  NMR (100 MHz,  $\text{CDCl}_3$ , 25  $^\circ\text{C}$ ) of **8**.

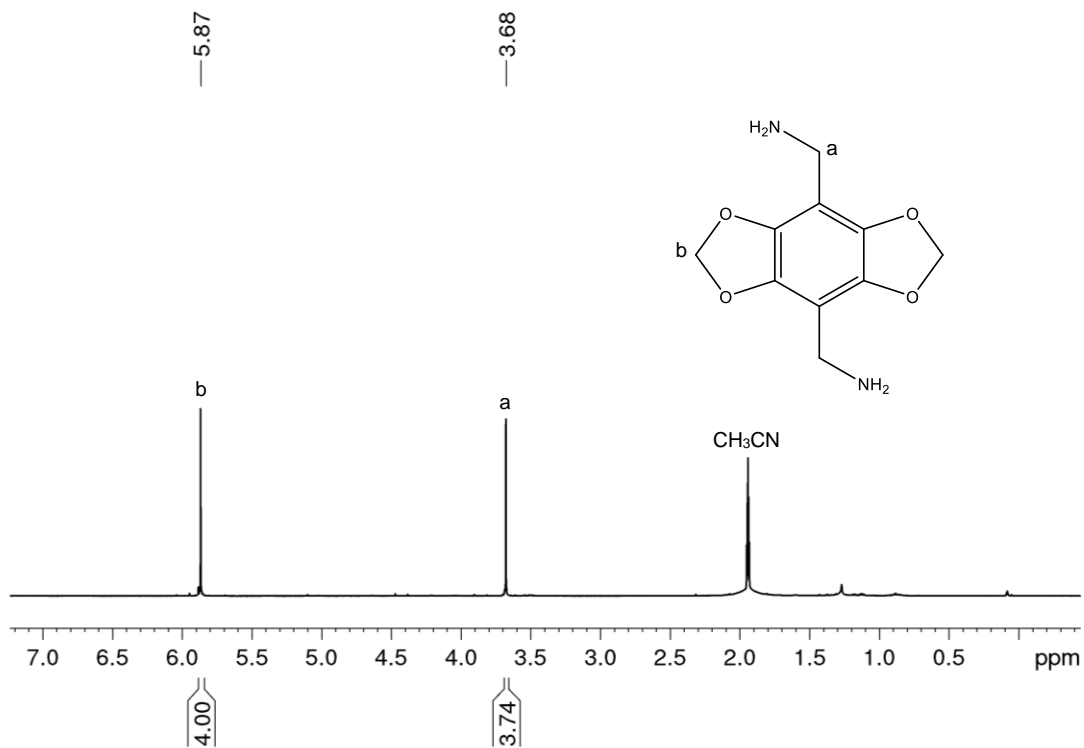

**Figure S11:**  $^1\text{H}$  NMR (500 MHz,  $\text{CD}_3\text{CN}$ , 25 °C) of **9**.

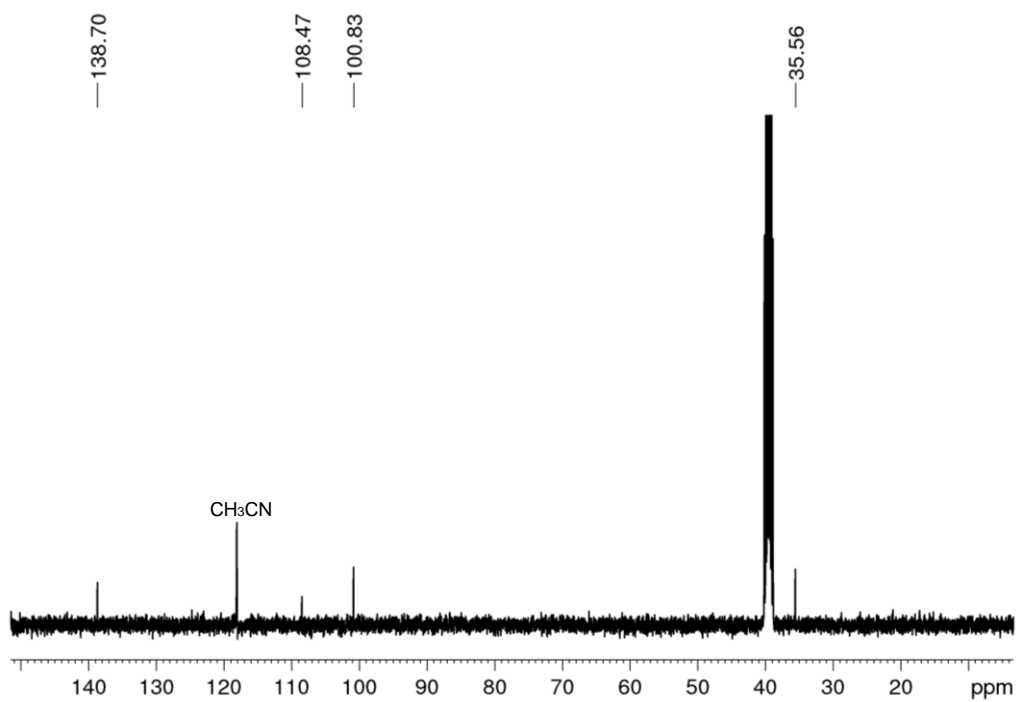

**Figure S12:**  $^{13}\text{C}$  NMR (100 MHz,  $\text{DMSO}-d_6$ , 25 °C) of **9**.

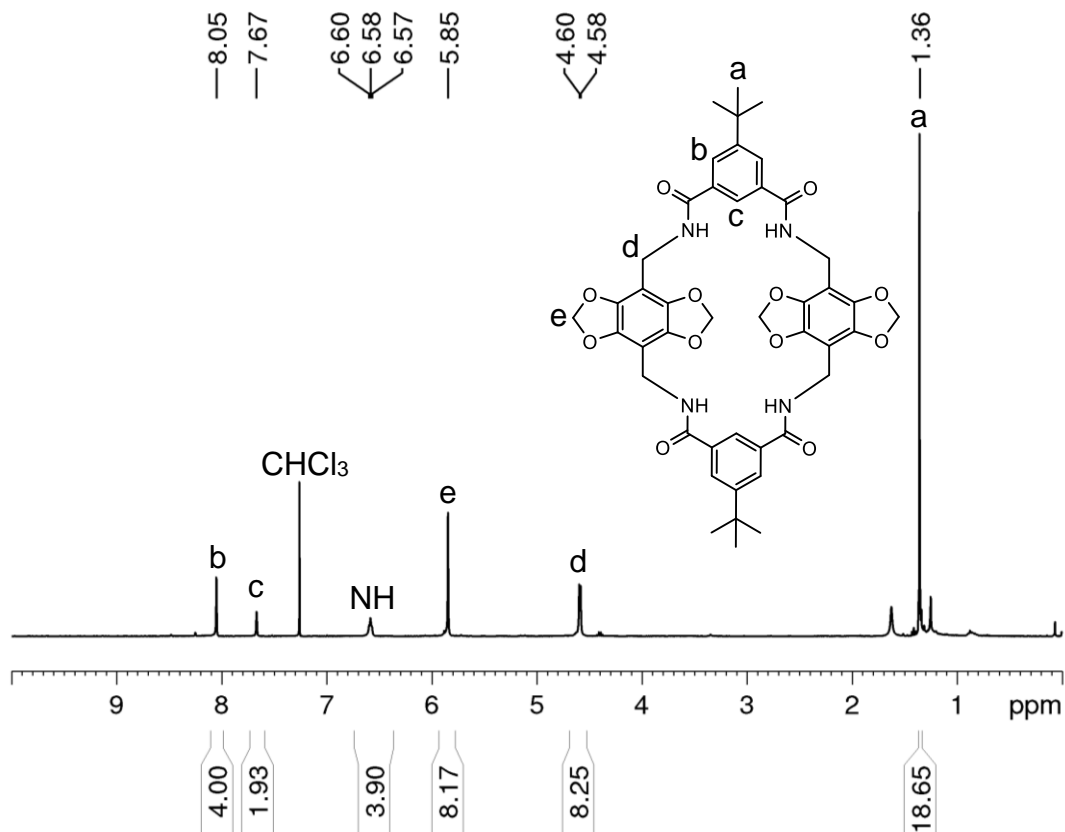

**Figure S13:**  $^1\text{H}$  NMR (400 MHz,  $\text{CDCl}_3$ , 25 °C) of **M5**.

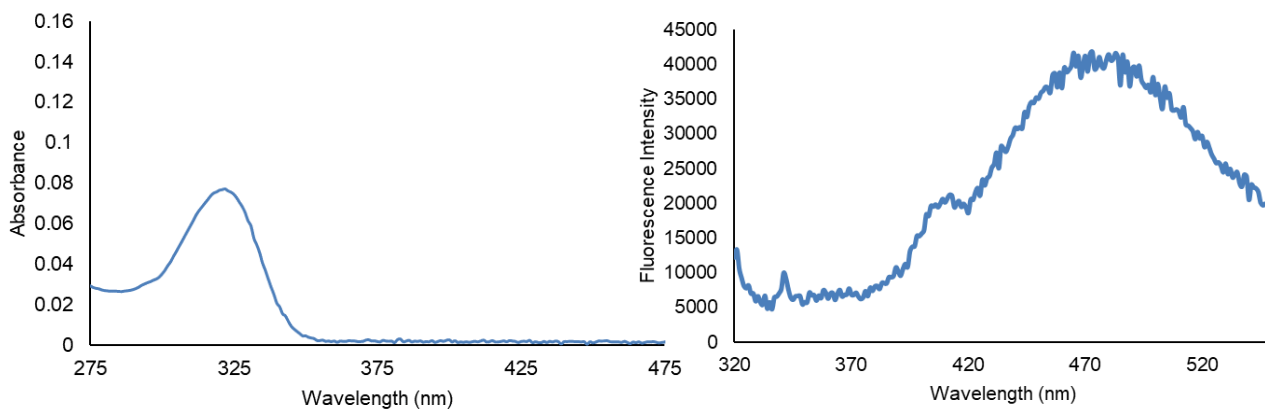

**Figure S14:** Absorbance and fluorescence spectra (ex. 310 nm, slit width: 2 nm) of 5.0  $\mu\text{M}$  **M5** in  $\text{CHCl}_3$ .



## B. Threading of M3

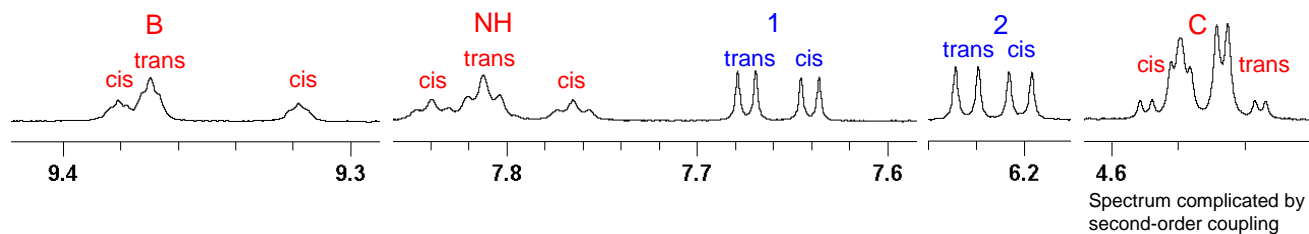

**Figure S15:** Expansion of manuscript Figure 1 showing labels of peaks corresponding to cis and trans conformations of encapsulated **S1**.

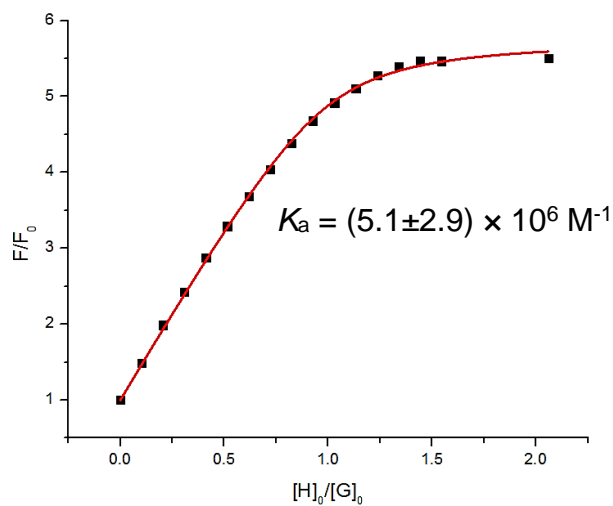

**Figure S16:** Representative titration of 3.0  $\mu\text{M}$  **S1** with increasing equivalents of **M3** in  $\text{CHCl}_3$  fitted to a 1:1 binding model (ex. 600 nm, em. 690 nm, slit width: 2 nm at 22  $^\circ\text{C}$ ).  $K_a$  is the average and standard deviation of three independent measurements.

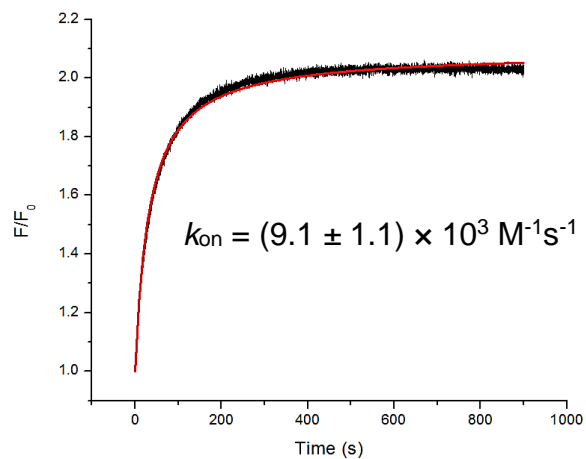

**Figure S17:** Representative curve for association of 3.0  $\mu\text{M}$  **S1** with 1.5 equivalents **M3** in  $\text{CHCl}_3$  fitted to second-order kinetics (ex. 600 nm, em. 690 nm, slit width: 2 nm at 22  $^\circ\text{C}$ ).  $k_{on}$  is the average and standard deviation of three independent measurements.

### C. Evidence Showing No Threading of M4a

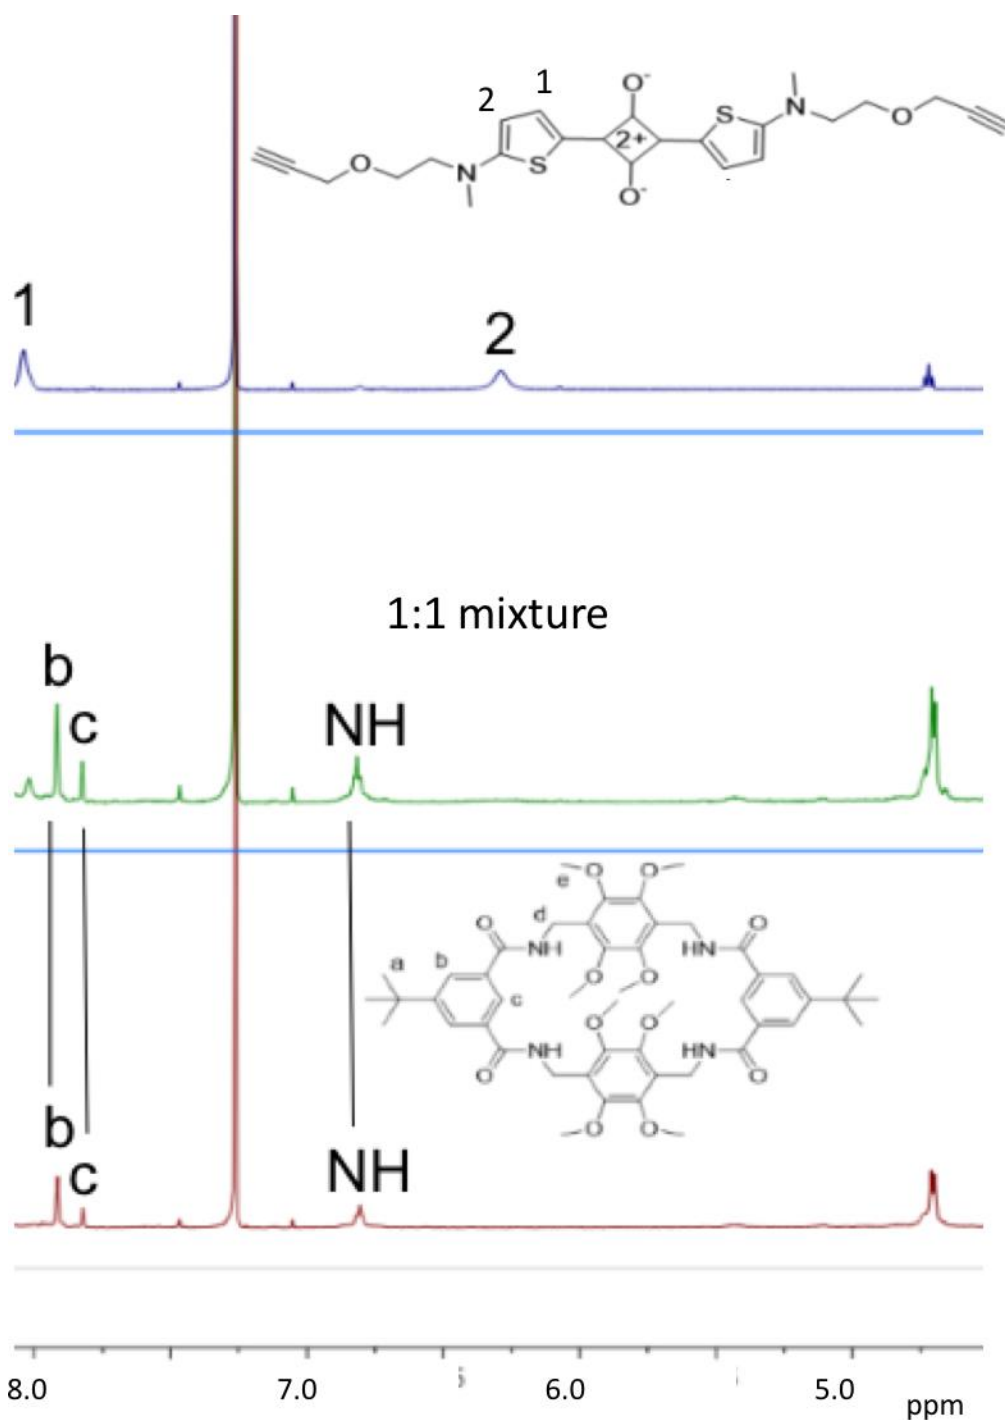

**Figure S18:** Partial <sup>1</sup>H NMR (500 MHz, CDCl<sub>3</sub>, 25 °C) indicating lack of change in chemical shift upon mixing **S1** and **M4a** at 1.0 mM concentration. Furthermore, dye protons 2 remain broad due to slow bond rotation in CDCl<sub>3</sub> and conformational exchange; this is in contrast to manuscript Figure 1 where protons 2 become sharper upon encapsulation inside **M3** which inhibits dye bond rotation.

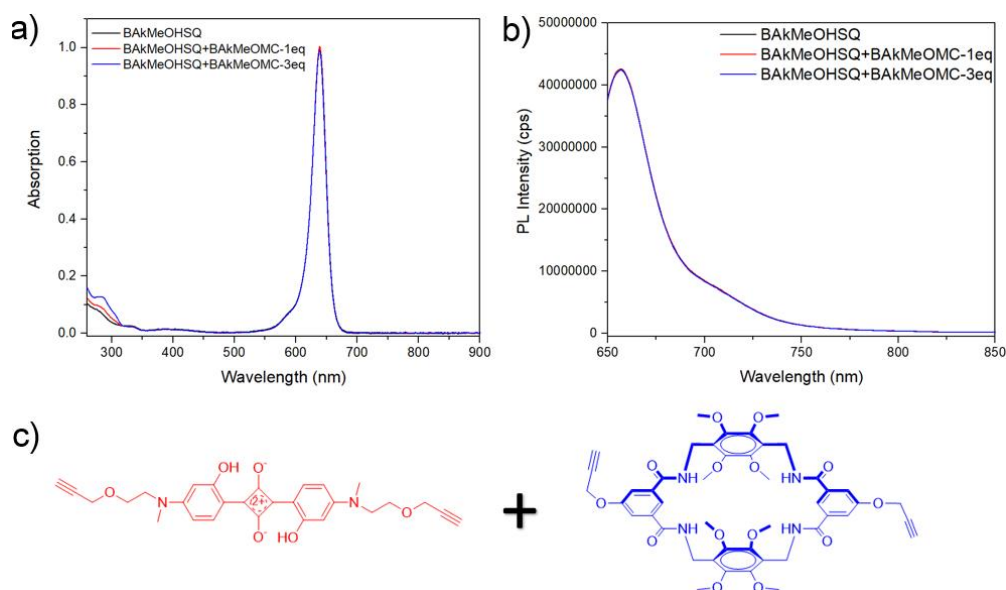

**Figure S19:** a) Absorbance and b) fluorescence spectra of 3.0  $\mu\text{M}$  squaraine **S2**<sup>S1</sup> indicating no spectral change upon addition of **M4b** (ex. 640 nm, slit width: 2 nm).

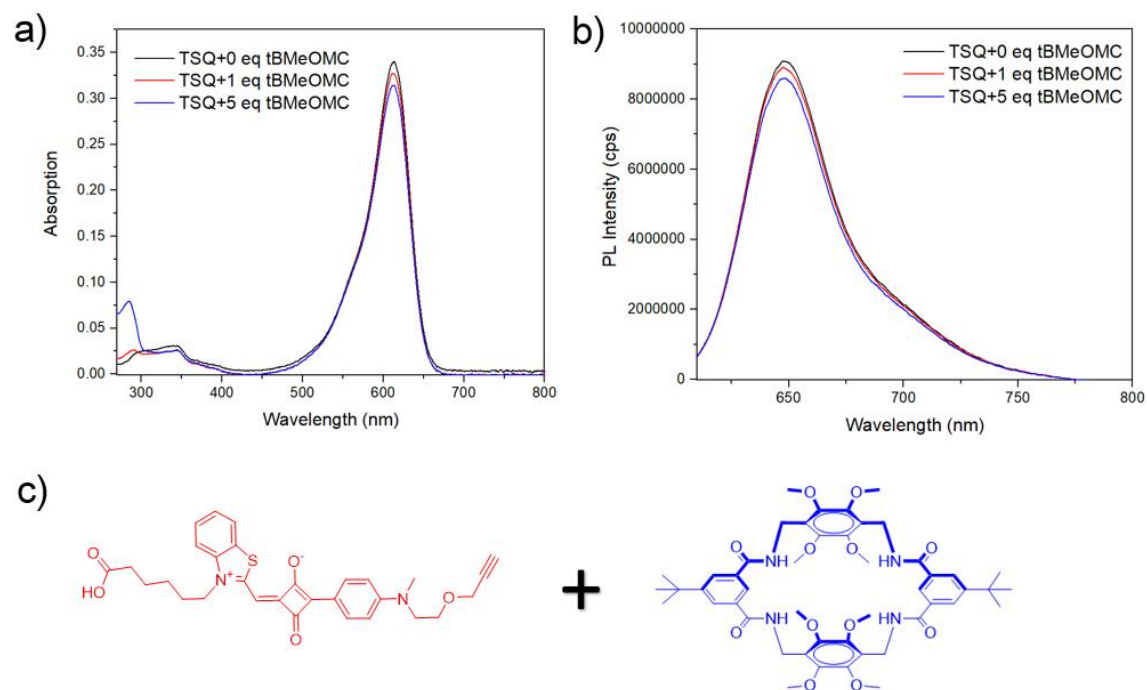

**Figure S20:** a) Absorbance and b) fluorescence spectra of 3.0  $\mu\text{M}$  squaraine **S3**<sup>S2</sup> indicating no spectral change upon addition of **M4a** (ex. 600 nm, slit width: 2 nm).

## D. Threading of M5

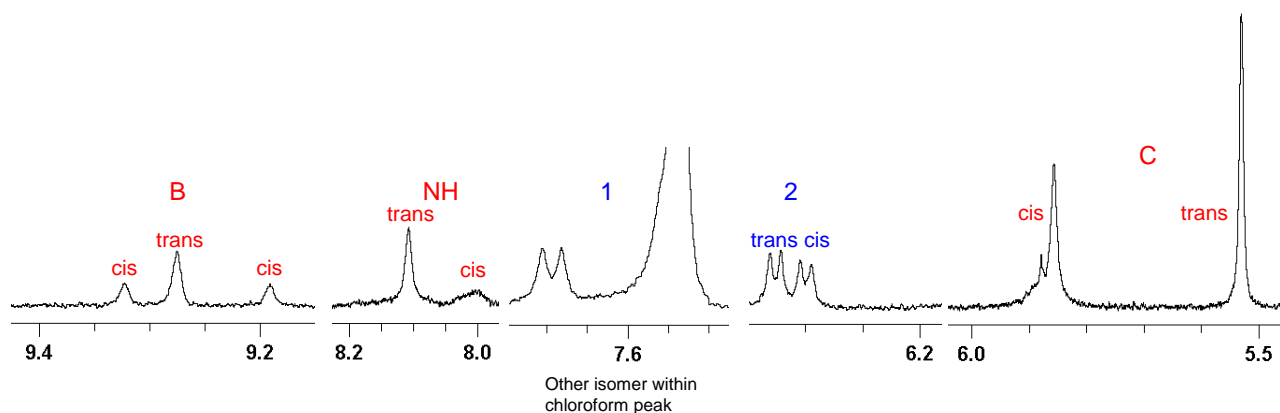

**Figure S21:** Expansion of manuscript Figure 5 now showing labels of peaks corresponding to cis and trans conformations of encapsulated **S1**.

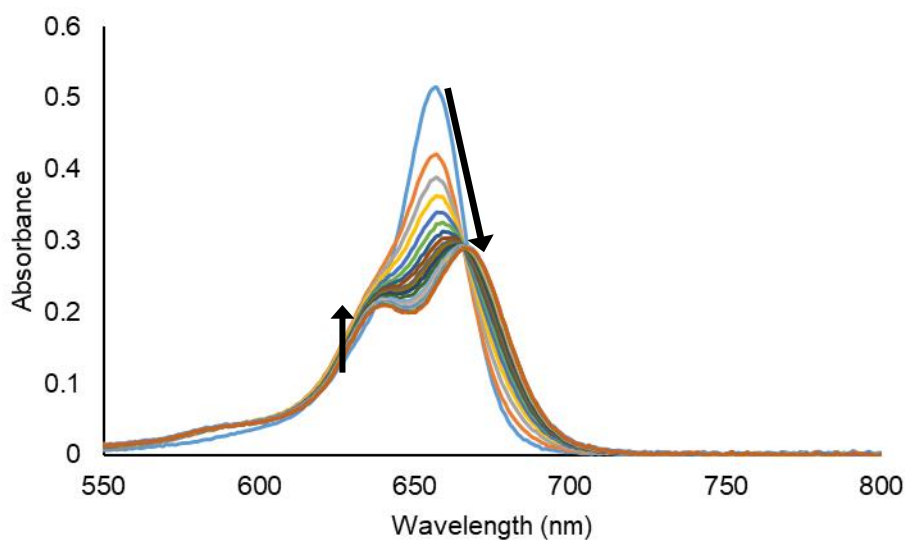

**Figure S22:** Absorbance spectrum of 3.0 μM **S1** upon sequential addition of 0-4.0 equiv. **M5**, indicating appearance of a red-shifted absorption maxima band and also a blue-shifted band due to self-aggregation of the complex.

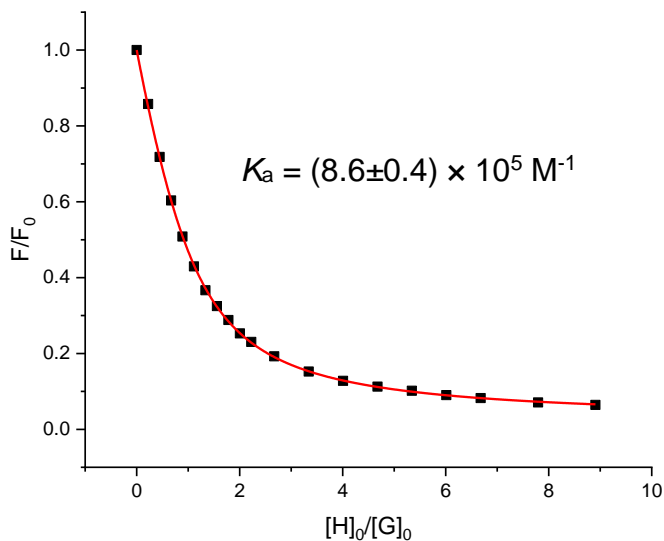

**Figure S23:** Representative titration of 3.0  $\mu\text{M}$  **S1** with increasing equivalents of **M5** in  $\text{CHCl}_3$  fitted to a 1:1 binding model (ex. 650 nm, em. 668 nm, slit width: 2 nm at 25  $^\circ\text{C}$ ).  $K_a$  is the average and standard deviation of three independent measurements.

## E. References

- S1. Liu, W.; Gómez-Durán, C. F. A.; Smith, B. D. Fluorescent Neuraminidase Assay Based on Supramolecular Dye Capture after Enzymatic Cleavage. *J. Am. Chem. Soc.* **2017**, *139* (18), 6390–6395.
- S2. Jarvis, T.; Roland, F.; Dubiak, K.; Huber, P.; Smith, B. Time-Lapse Imaging of Cell Death in Cell Culture and Whole Living Organisms Using Turn-on Deep-Red Fluorescent Probes. *J. Mater. Chem. B* **2018**, 4963–4971.
